# Supplementary figures and images for: Lateral Canthotomy Revisited: A Refined Surgical Approach for Orbital Access
Source: PubMed Central journal article supplement — Plast Reconstr Surg Glob Open. 2023 May 22;11(5):e5014. doi: 10.1097/GOX.0000000000005014 (PMC10287141; doi:10.1097/gox.0000000000005014), 2023-05-22

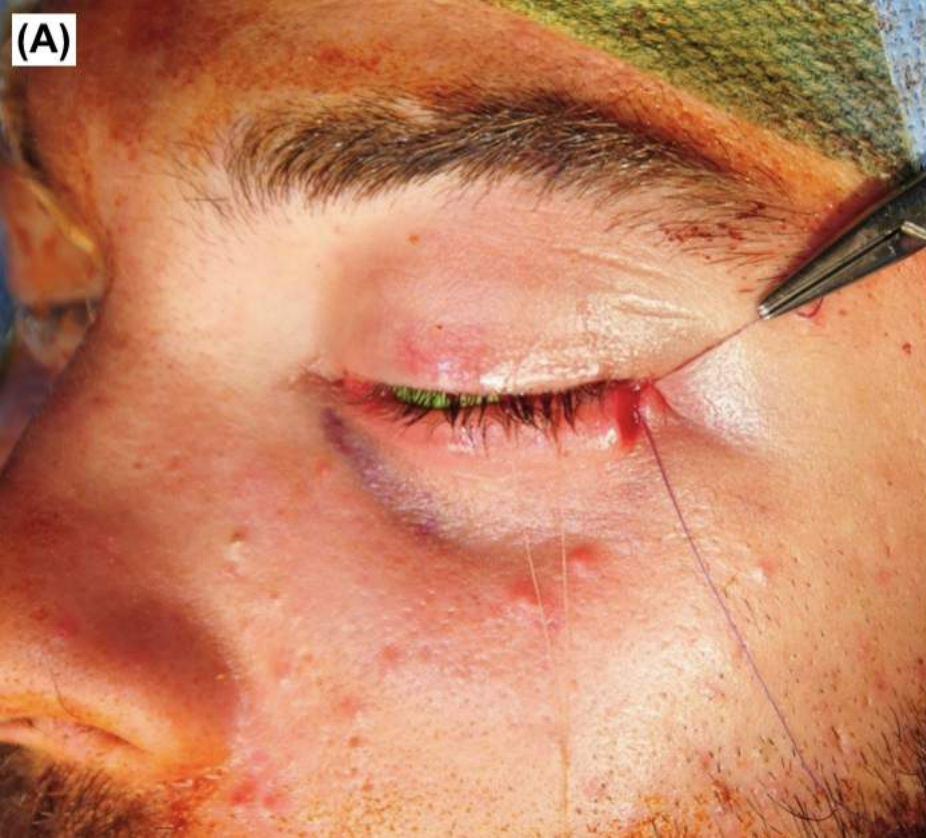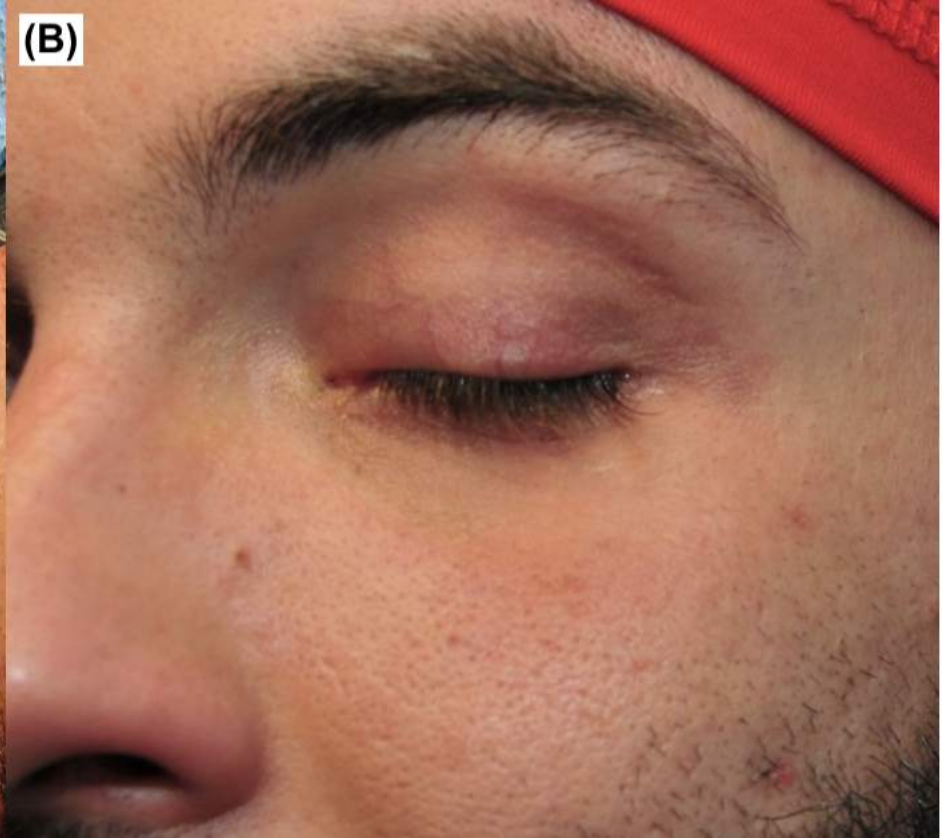

Supplement: gox-11-e5014-s001.pdf [file gox-11-e5014-s001.pdf]
